# Supplementary material
Source: PubMed Central journal article supplement (PMC10844309)
Supplement: 41416_2023_2519_MOESM1_ESM.pdf [file 41416_2023_2519_MOESM1_ESM.pdf]

Figure S1. Subgroup analysis of objective response rate in patients treated with cadonilimab 15mg/kg and 10mg/kg every 3 weeks (Q3W)

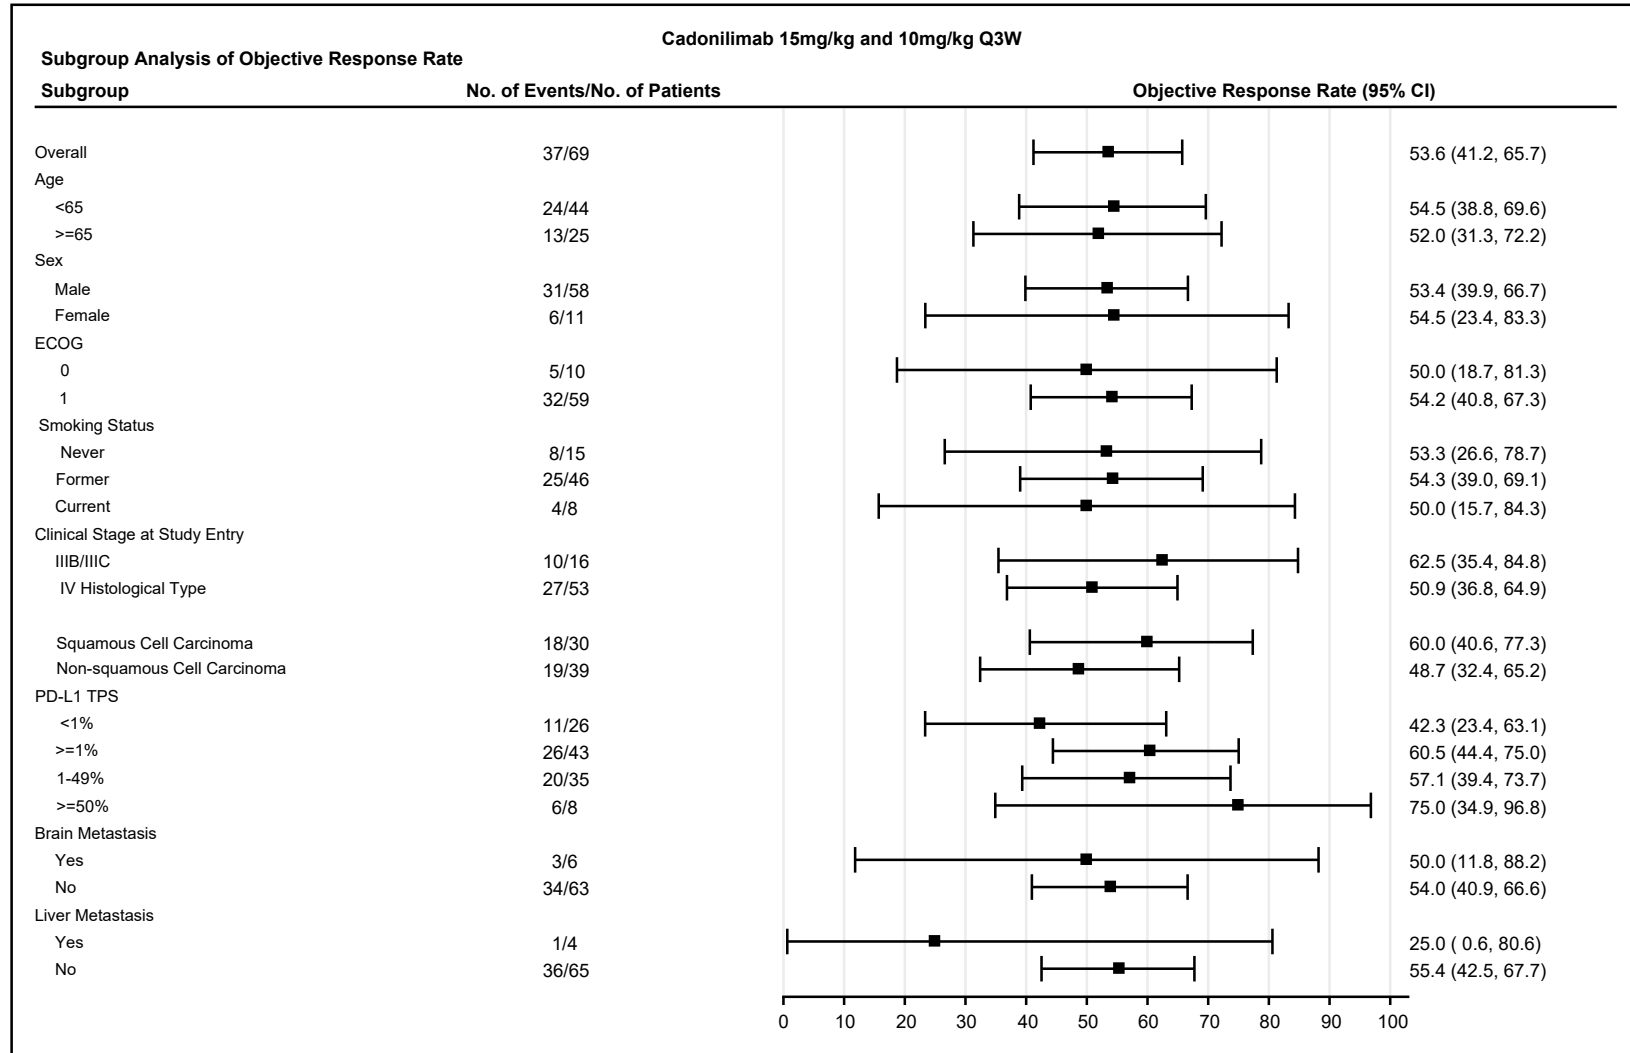

Figure S2. Kaplan-Meier curves of progression-free survival in patients treated with cadonilimab 15mg/kg and 10mg/kg every 3 weeks (Q3W). (A) By programmed cell death ligand-1 status (positive versus negative). (B) By pathology (squamous versus non-squamous carcinoma)

A

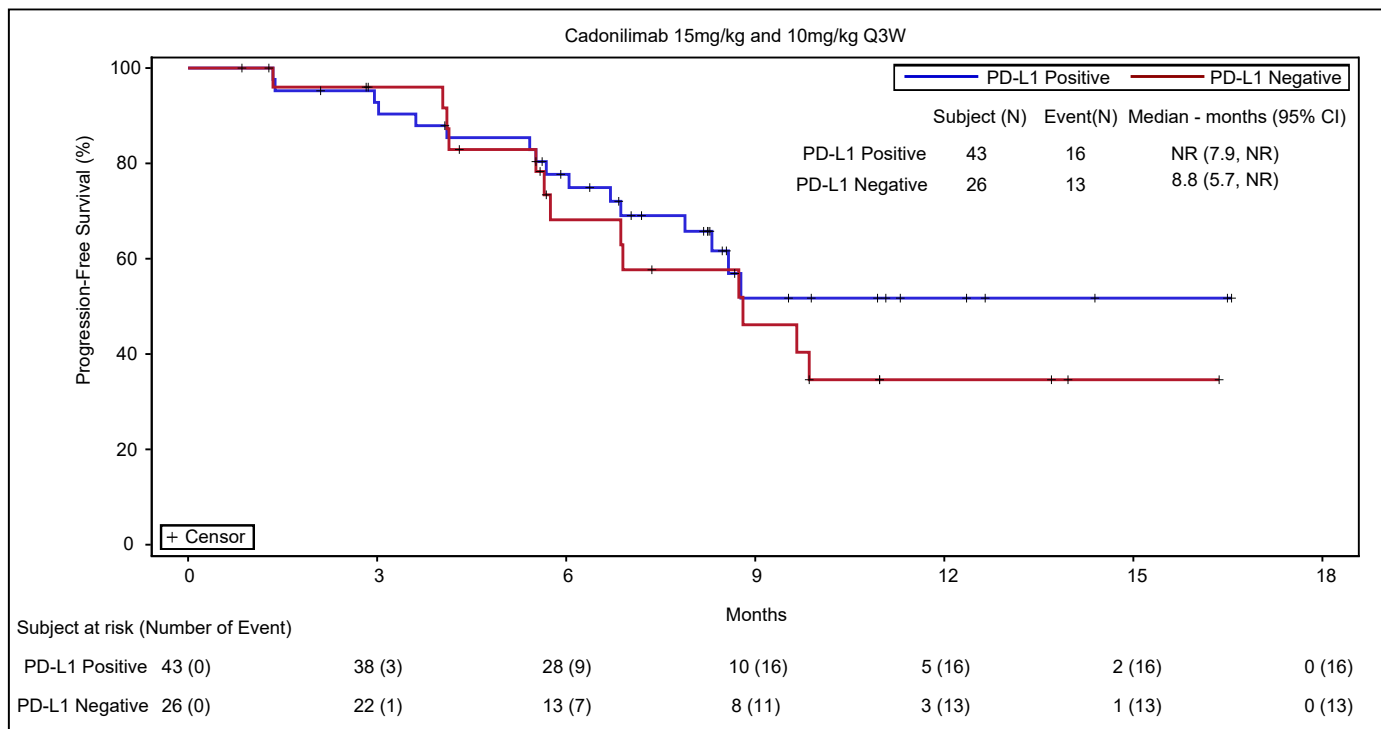

B

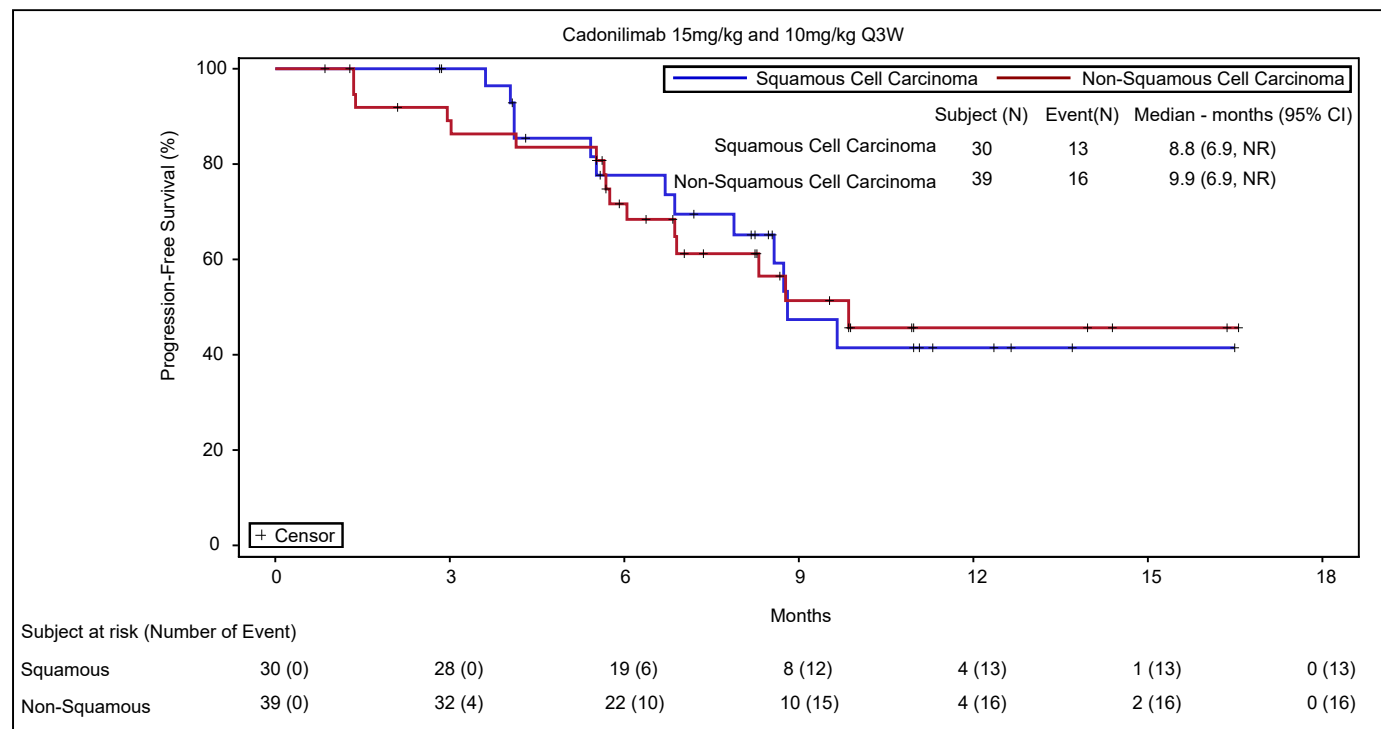

Table S1. Treatment-related adverse events occurring in  $\geq 10\%$  of patients in either dosing group

| Preferred Term                              | Cadonilimab<br>15mg/kg Q3W<br>(N=49) |                | Cadonilimab<br>10mg/kg Q3W<br>(N=20) |                | Overall<br>(N=69) |                |
|---------------------------------------------|--------------------------------------|----------------|--------------------------------------|----------------|-------------------|----------------|
|                                             | All Grade                            | $\geq$ Grade 3 | All Grade                            | $\geq$ Grade 3 | All Grade         | $\geq$ Grade 3 |
| Subject with any TRAEs, n (%)               | 48 (98.0)                            | 29 (59.2)      | 19 (95.0)                            | 5 (25.0)       | 67 (97.1)         | 34 (49.3)      |
| Hypothyroidism                              | 22 (44.9)                            | 0              | 5 (25.0)                             | 0              | 27 (39.1)         | 0              |
| Aspartate aminotransferase increased        | 17 (34.7)                            | 0              | 6 (30.0)                             | 0              | 23 (33.3)         | 0              |
| Decreased appetite                          | 17 (34.7)                            | 2 (4.1)        | 2 (10.0)                             | 0              | 19 (27.5)         | 2 (2.9)        |
| Amylase increased                           | 14 (28.6)                            | 1 (2.0)        | 4 (20.0)                             | 0              | 18 (26.1)         | 1 (1.4)        |
| Blood thyroid stimulating hormone increased | 13 (26.5)                            | 0              | 4 (20.0)                             | 0              | 17 (24.6)         | 0              |
| Hypertension                                | 12 (24.5)                            | 5 (10.2)       | 5 (25.0)                             | 0              | 17 (24.6)         | 5 (7.2)        |
| Hypertriglyceridaemia                       | 12 (24.5)                            | 0              | 5 (25.0)                             | 0              | 17 (24.6)         | 0              |
| Proteinuria                                 | 12 (24.5)                            | 0              | 5 (25.0)                             | 0              | 17 (24.6)         | 0              |
| Hyperthyroidism                             | 12 (24.5)                            | 0              | 4 (20.0)                             | 0              | 16 (23.2)         | 0              |
| Alanine aminotransferase increased          | 10 (20.4)                            | 0              | 5 (25.0)                             | 0              | 15 (21.7)         | 0              |
| Fatigue                                     | 13 (26.5)                            | 0              | 2 (10.0)                             | 0              | 15 (21.7)         | 0              |
| Myalgia                                     | 10 (20.4)                            | 0              | 5 (25.0)                             | 0              | 15 (21.7)         | 0              |
| Palmar-plantar erythrodysesthesia syndrome  | 14 (28.6)                            | 0              | 1 (5.0)                              | 0              | 15 (21.7)         | 0              |
| Chest discomfort                            | 11 (22.4)                            | 0              | 3 (15.0)                             | 0              | 14 (20.3)         | 0              |
| Dyspnoea                                    | 10 (20.4)                            | 1 (2.0)        | 4 (20.0)                             | 0              | 14 (20.3)         | 1 (1.4)        |
| Haemoptysis                                 | 12 (24.5)                            | 1 (2.0)        | 2 (10.0)                             | 0              | 14 (20.3)         | 1 (1.4)        |
| Infusion related reaction                   | 12 (24.5)                            | 1 (2.0)        | 2 (10.0)                             | 0              | 14 (20.3)         | 1 (1.4)        |
| Hyperlipidaemia                             | 11 (22.4)                            | 0              | 2 (10.0)                             | 0              | 13 (18.8)         | 0              |
| Rash                                        | 8 (16.3)                             | 0              | 5 (25.0)                             | 0              | 13 (18.8)         | 0              |
| Hepatic function abnormal                   | 11 (22.4)                            | 4 (8.2)        | 1 (5.0)                              | 1 (5.0)        | 12 (17.4)         | 5 (7.2)        |
| Muscular weakness                           | 8 (16.3)                             | 0              | 3 (15.0)                             | 0              | 11 (15.9)         | 0              |
| Weight decreased                            | 8 (16.3)                             | 0              | 3 (15.0)                             | 0              | 11 (15.9)         | 0              |
| Platelet count decreased                    | 7 (14.3)                             | 1 (2.0)        | 3 (15.0)                             | 1 (5.0)        | 10 (14.5)         | 2 (2.9)        |
| Pyrexia                                     | 6 (12.2)                             | 1 (2.0)        | 4 (20.0)                             | 0              | 10 (14.5)         | 1 (1.4)        |
| Blood bilirubin increased                   | 8 (16.3)                             | 0              | 1 (5.0)                              | 0              | 9 (13.0)          | 0              |
| Drug-induced liver injury                   | 7 (14.3)                             | 3 (6.1)        | 1 (5.0)                              | 0              | 8 (11.6)          | 3 (4.3)        |
| Hypercholesterolaemia                       | 6 (12.2)                             | 0              | 2 (10.0)                             | 0              | 8 (11.6)          | 0              |
| Anaemia                                     | 5 (10.2)                             | 0              | 2 (10.0)                             | 0              | 7 (10.1)          | 0              |
| Blood cholesterol increased                 | 5 (10.2)                             | 0              | 2 (10.0)                             | 0              | 7 (10.1)          | 0              |
| Blood urine present                         | 7 (14.3)                             | 0              | 0                                    | 0              | 7 (10.1)          | 0              |
| Diarrhoea                                   | 6 (12.2)                             | 0              | 1 (5.0)                              | 0              | 7 (10.1)          | 0              |
| Hyponatraemia                               | 6 (12.2)                             | 2 (4.1)        | 1 (5.0)                              | 1 (5.0)        | 7 (10.1)          | 3 (4.3)        |
| Neutrophil count decreased                  | 6 (12.2)                             | 0              | 1 (5.0)                              | 0              | 7 (10.1)          | 0              |
| Pain in extremity                           | 6 (12.2)                             | 0              | 1 (5.0)                              | 0              | 7 (10.1)          | 0              |
| Pneumonitis                                 | 6 (12.2)                             | 2 (4.1)        | 0                                    | 0              | 6 (8.7)           | 2 (2.9)        |
| Blood creatinine increased                  | 5 (10.2)                             | 0              | 0                                    | 0              | 5 (7.2)           | 0              |
| Hyperuricaemia                              | 3 (6.1)                              | 0              | 2 (10.0)                             | 0              | 5 (7.2)           | 0              |
| Hypochlorhaemia                             | 5 (10.2)                             | 2 (4.1)        | 0                                    | 0              | 5 (7.2)           | 2 (2.9)        |
| White blood cell count decreased            | 5 (10.2)                             | 0              | 0                                    | 0              | 5 (7.2)           | 0              |
| Electrocardiogram abnormal                  | 2 (4.1)                              | 0              | 2 (10.0)                             | 0              | 4 (5.8)           | 0              |
| Haematuria                                  | 2 (4.1)                              | 0              | 2 (10.0)                             | 1 (5.0)        | 4 (5.8)           | 1 (1.4)        |
| Bilirubin conjugated increased              | 1 (2.0)                              | 0              | 2 (10.0)                             | 0              | 3 (4.3)           | 0              |
| Blood glucose increased                     | 1 (2.0)                              | 0              | 2 (10.0)                             | 0              | 3 (4.3)           | 0              |
| Agitation                                   | 0                                    | 0              | 2 (10.0)                             | 0              | 2 (2.9)           | 0              |

TRAEs: Treatment-related adverse events; Q3W: every 3 weeks.

Table S2. Overview of immune-related adverse events (irAEs)

|                                                                   | <b>Cadonilimab<br/>15mg/kg Q3W<br/>(N=49)</b> | <b>Cadonilimab<br/>10mg/kg Q3W<br/>(N=20)</b> | <b>Overall<br/>(N=69)</b> |
|-------------------------------------------------------------------|-----------------------------------------------|-----------------------------------------------|---------------------------|
| irAEs, n (%)                                                      | 10 (20.4)                                     | 4 (20.0)                                      | 14 (20.3)                 |
| Grade $\geq$ 3 irAEs, n (%)                                       | 2 (4.1)                                       | 2 (10.0)                                      | 4 (5.8)                   |
| Serious irAEs, n (%)                                              | 7 (14.3)                                      | 3 (15.0)                                      | 10 (14.5)                 |
| irAEs leading to cadonilimab and anlotinib discontinuation, n (%) | 0                                             | 1 (5.0)                                       | 1 (1.4)                   |
| irAEs leading to cadonilimab discontinuation, n (%)               | 0                                             | 1 (5.0)                                       | 1 (1.4)                   |
| irAEs leading to anlotinib discontinuation, n (%)                 | 0                                             | 1 (5.0)                                       | 1 (1.4)                   |
| irAEs leading to death, n (%)                                     | 0                                             | 0                                             | 0                         |

irAEs: Immune-related adverse events; Q3W: every 3 weeks.

Table S3. irAEs by Preferred Terms in either dosing group

| Preferred Term              | Cadonilimab<br>15mg/kg Q3W<br>(N=49) |           | Cadonilimab<br>10mg/kg Q3W<br>(N=20) |           | Overall<br>(N=69) |           |
|-----------------------------|--------------------------------------|-----------|--------------------------------------|-----------|-------------------|-----------|
|                             | All Grade                            | ≥ Grade 3 | All Grade                            | ≥ Grade 3 | All Grade         | ≥ Grade 3 |
| Subjects with Any irAEs     | 10 (20.4)                            | 2 (4.1)   | 4 (20.0)                             | 2 (10.0)  | 14 (20.3)         | 4 (5.8)   |
| Hypothyroidism              | 3 (6.1)                              | 0         | 1 (5.0)                              | 0         | 4 (5.8)           | 0         |
| Hypopituitarism             | 2 (4.1)                              | 1 (2.0)   | 1 (5.0)                              | 0         | 3 (4.3)           | 1 (1.4)   |
| Lymphocytic hypophysitis    | 2 (4.1)                              | 0         | 0                                    | 0         | 2 (2.9)           | 0         |
| Immune-mediated arthritis   | 1 (2.0)                              | 1 (2.0)   | 0                                    | 0         | 1 (1.4)           | 1 (1.4)   |
| Immune-mediated myositis    | 1 (2.0)                              | 0         | 0                                    | 0         | 1 (1.4)           | 0         |
| Osteoarthritis              | 1 (2.0)                              | 0         | 0                                    | 0         | 1 (1.4)           | 0         |
| Autoimmune hepatitis        | 0                                    | 0         | 1 (5.0)                              | 1 (5.0)   | 1 (1.4)           | 1 (1.4)   |
| Cortisol abnormal           | 1 (2.0)                              | 0         | 0                                    | 0         | 1 (1.4)           | 0         |
| Ketoacidosis                | 0                                    | 0         | 1 (5.0)                              | 1 (5.0)   | 1 (1.4)           | 1 (1.4)   |
| Immune-mediated pneumonitis | 1 (2.0)                              | 0         | 0                                    | 0         | 1 (1.4)           | 0         |

irAEs: Immune-related adverse events; Q3W: every 3 weeks.

Table S4. Tumor response in patients treated with cadonilimab 15mg/kg and 10mg/kg every 3 weeks (Q3W)

| <b>Cadonilimab 15mg/kg and 10mg/kg Q3W</b> |                                  |                                  |                                               |                                                   |                           |
|--------------------------------------------|----------------------------------|----------------------------------|-----------------------------------------------|---------------------------------------------------|---------------------------|
|                                            | <b>PD-L1 Positive<br/>(N=43)</b> | <b>PD-L1 Negative<br/>(N=26)</b> | <b>Squamous Cell<br/>Carcinoma<br/>(N=30)</b> | <b>Non-Squamous Cell<br/>Carcinoma<br/>(N=39)</b> | <b>Overall<br/>(N=69)</b> |
| ORR, % (95% CI)                            | 60.5 (44.4, 75.0)                | 42.3 (23.4, 63.1)                | 60.0 (40.6, 77.3)                             | 48.7 (32.4, 65.2)                                 | 53.6 (41.2, 65.7)         |
| DCR, % (95% CI)                            | 93.0 (80.9, 98.5)                | 92.3 (74.9, 99.1)                | 100 (88.4, 100)                               | 87.2 (72.6, 95.7)                                 | 92.8 (83.9, 97.6)         |
| Best Overall Response, n (%)               |                                  |                                  |                                               |                                                   |                           |
| CR                                         | 0                                | 0                                | 0                                             | 0                                                 | 0                         |
| PR                                         | 26 (60.5)                        | 11 (42.3)                        | 18 (60.0)                                     | 19 (48.7)                                         | 37 (53.6)                 |
| SD                                         | 14 (32.6)                        | 13 (50.0)                        | 12 (40.0)                                     | 15 (38.5)                                         | 27 (39.1)                 |
| PD                                         | 2 (4.7)                          | 1 (3.8)                          | 0                                             | 3 (7.7)                                           | 3 (4.3)                   |
| NE                                         | 0                                | 1 (3.8)                          | 0                                             | 1 (2.6)                                           | 1 (1.4)                   |
| NA                                         | 1 (2.3)                          | 0                                | 0                                             | 1 (2.6)                                           | 1 (1.4)                   |
| DOR, Median (months), (95% CI)             | NR (5.8, NR)                     | NR (2.9, NR)                     | NR (5.6, NR)                                  | NR (4.5, NR)                                      | NR (5.8, NR)              |

PD-L1, programmed cell death ligand-1; ORR, objective response rate; DCR, disease control rate; CI, confidence interval. NE, not evaluable; NA, no post-baseline tumor assessment; DOR, duration of response; NR, not reached; Q3W, every 3 weeks.
